# Supplementary material for: Obesity and normal birth: A qualitative study of clinician’s management of obese pregnant women during labour
Source: Springer Nature journal article supplement (doi:10.1186/s12884-015-0673-2), 2015-10-12
Supplement: MOESM1 [file 9743432]

### **Interview Guide (Version 1. 1/11/10)**

- 1) Have you experienced any particular issues (or problems) when caring for an obese woman during labour? What were these?
  
- 2) How did these affect the care you provided/were able to provide?
  
- 3) Can you think of any possible solutions to these issues? What has worked well in caring for obese women?
  
- 4) Do you think intrapartum care of obese women should be managed differently to non-obese women?
  
- 5) Do you feel that you have enough information or training in the care of obese women? Is there any information/training you would like to receive in this area?
